# Supplementary material for: Ultrafast Transient Absorption Spectra and Kinetics of Rod and Cone Visual Pigments
Source: MDPI journal article supplement (doi:10.3390/molecules28155829), 2023-08-02
Supplement: s1 [file s1]

# **SUPPLEMENTARY INFORMATION**

## **Ultrafast Transient Absorption Spectra and Kinetics of Rod and Cone Visual Pigments**

Arjun Krishnamoorthi <sup>1</sup>, Keyvan Khosh Abady <sup>1</sup>, Dinesh Dhankhar <sup>1,2</sup> and  
Peter M. Rentzepis <sup>1,\*</sup>

<sup>1</sup> Department of Electrical and Computer Engineering, Texas A&M University,  
College Station, TX 77843, USA

<sup>2</sup> Present address: Thermo Fisher Scientific, Hillsboro, OR 97124, USA

\* Correspondence: prentzepis@tamu.edu

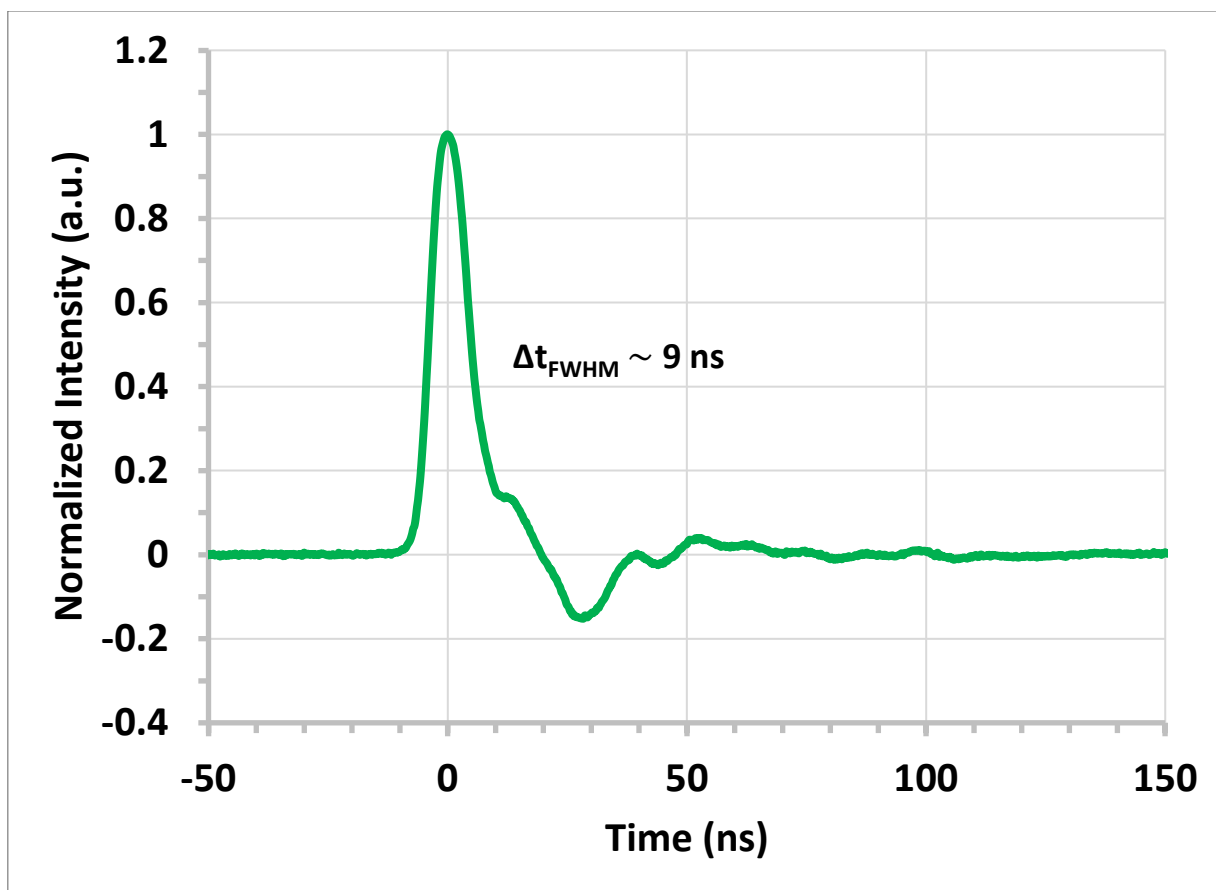

Figure S1. Temporal response of the PMT due to the  $\sim 532$  nm pump (excitation) pulse.
